# Supplementary material for: Kinetically controlled ammonia vapor diffusion synthesis of a Zn(ii) MOF and its H2O/NH3 adsorption properties
Source: Royal Society of Chemistry journal article supplement (doi:10.1039/c6ta03314h), 2016-01-01
Supplement: c6ta03314h1.pdf [file c6ta03314h1.pdf]

1 **Kinetically controlled ammonia vapor diffusion synthesis of**  
2 **a Zn(II) MOF and its H<sub>2</sub>O/NH<sub>3</sub> adsorption properties**

3 Yang Chen, Chengyin Yang, Xiaoqing Wang, Jiangfeng Yang\*, Kun Ouyang, Jinping Li\*

4 Research Institute of Special Chemicals, Taiyuan University of Technology, Taiyuan 030024, Shanxi, China Email:  
5 jpli211@hotmail.com

6

7

8

9

10

11

12

13

14

15

16

17

18

19

20

21

22

**Contents**

23 1. Comparative experiments.....2  
24 2. Single crystal data of Zn(INA)<sub>2</sub>(H<sub>2</sub>O)<sub>4</sub>.....3  
25 3. TG curve of Zn(INA)<sub>2</sub>(H<sub>2</sub>O)<sub>4</sub>.....5  
26 4. SEM images of Zn(INA)<sub>2</sub> and Zn(INA)<sub>2</sub>(H<sub>2</sub>O)<sub>2</sub>(NH<sub>3</sub>)<sub>2</sub>.....6  
27 5. NH<sub>3</sub>-TPD test of Zn(INA)<sub>2</sub>.....7  
28 6. H<sub>2</sub>O/NH<sub>3</sub> co-adsorption method of Zn(INA)<sub>2</sub> .....8  
29 7. Compared PXRD patterns of Zn(INA)<sub>2</sub>(H<sub>2</sub>O)<sub>2</sub>(NH<sub>3</sub>)<sub>2</sub> .....9  
30 8. NH<sub>3</sub> adsorption performance for Zn(INA)<sub>2</sub> in moist condition.....12

## 32 1. Comparative experiments

33 The comparative experiments are carried out by adding  $\text{NH}_3 \cdot \text{H}_2\text{O}$  (25%) directly to  
34 adjust the pH value in synthesis of  $\text{Zn}(\text{INA})_2(\text{H}_2\text{O})_4$ . In Fig S1, the blank experiment  
35 was labeled as vial 1, which had the same reactive raw materials with original  
36 reaction while  $\text{NH}_3 \cdot \text{H}_2\text{O}$  was not added; vial 2 was corresponding to that 5  $\mu\text{L}$   
37  $\text{NH}_3 \cdot \text{H}_2\text{O}$  (25%) was added to adjust the pH vale to 5; vial 3 was corresponding to  
38 that 10  $\mu\text{L}$   $\text{NH}_3 \cdot \text{H}_2\text{O}$  (25%) was added to adjust the pH vale to 7.

39 Fig. S1 shows the reaction phenomenon and products' XRD patterns. The blank  
40 experiment in vial 1 indicates that there is not any product although the reaction is  
41 maintained for 12 h, the PXRD patterns suggest the leftover material is undissolved  
42 HINA. On the other side, the flocculent precipitate can be generated immediately  
43 while  $\text{NH}_3 \cdot \text{H}_2\text{O}$  is added to reaction solution in vial 2 and 3, whose PXRD patterns  
44 are similar to that of  $\text{Zn}_5(\text{OH})_8(\text{NO}_3)_2 \cdot 2\text{NH}_3$ . This phenomenon is attributed to that  
45 adding  $\text{NH}_3 \cdot \text{H}_2\text{O}$  causes a huge pH value change, and  $\text{NH}_3 \cdot \text{H}_2\text{O}$  reacts with  $\text{Zn}^{2+}$ ,  
46  $\text{NO}_3^-$ , as well as little dissolved  $\text{INA}^-$  in the upper solution, which results in the  
47 formation of  $\text{Zn}_5(\text{OH})_8(\text{NO}_3)_2 \cdot 2\text{NH}_3$  rather than  $\text{Zn}(\text{INA})_2(\text{H}_2\text{O})_4$ . Moreover, the  
48 precipitate wouldn't change to  $\text{Zn}(\text{INA})_2$  when it was heated at 150  $^\circ\text{C}$  for 2 h.  
49 Therefore, kinetically controlled ammonia vapor diffusion method can afford a  
50 alleviate way to adjust the reaction environment so as to synthesize  $\text{Zn}(\text{INA})_2(\text{H}_2\text{O})_4$   
51 crystal film rapidly.

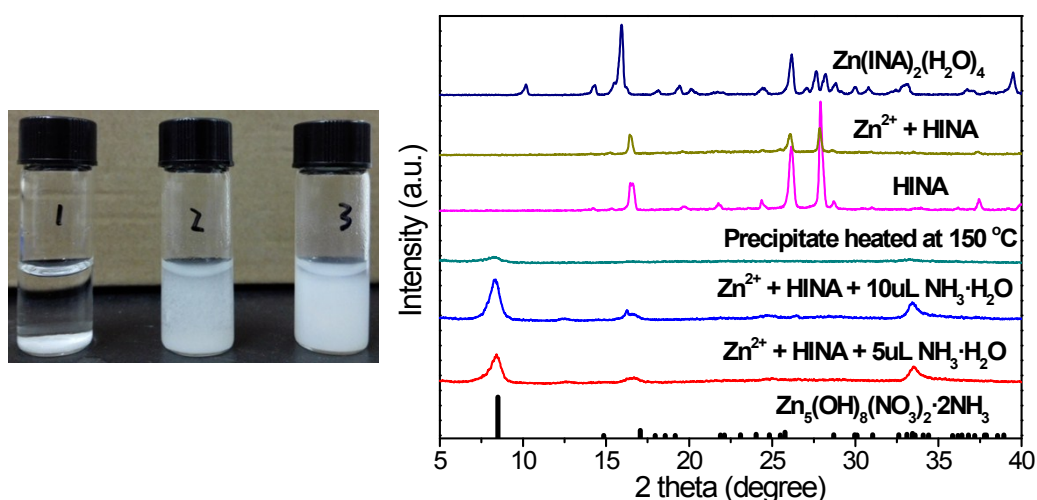

52

53

**Fig. S1** Comparative experiments of adding ammonia amount and the way

55 **2. Single crystal data of Zn(INA)<sub>2</sub>(H<sub>2</sub>O)<sub>4</sub>**56 **Table S1** Crystal data and structure refinement for Zn(INA)<sub>2</sub>(H<sub>2</sub>O)<sub>4</sub>.

|                                            |                                                                  |
|--------------------------------------------|------------------------------------------------------------------|
| Empirical formula                          | C <sub>12</sub> H <sub>16</sub> N <sub>2</sub> O <sub>8</sub> Zn |
| Formula weight                             | 381.64                                                           |
| Wavelength (Å)                             | 1.54184                                                          |
| Crystal system                             | Triclinic                                                        |
| Space group                                | P-1                                                              |
| a (Å)                                      | 6.3057(3)                                                        |
| b (Å)                                      | 6.8347(4)                                                        |
| c (Å)                                      | 9.2969(4)                                                        |
| α(°)                                       | 95.963(7)                                                        |
| β(°)                                       | 104.998(4)                                                       |
| γ(°)                                       | 113.213(6)                                                       |
| Volume (Å <sup>3</sup> )                   | 345.99(4)                                                        |
| Z                                          | 1                                                                |
| D <sub>calc</sub> (mg m <sup>-3</sup> )    | 1.832                                                            |
| Absorption coefficient (mm <sup>-1</sup> ) | 2.936                                                            |
| F(000)                                     | 196                                                              |
| θ range (°)                                | 5.06 – 74.11                                                     |
|                                            | -7 ≤ h ≤ 7                                                       |
| Limiting indices                           | -8 ≤ k ≤ 8                                                       |
|                                            | -11 ≤ l ≤ 11                                                     |
| Goodness-of-fit on F <sup>2</sup>          | 1.112                                                            |
| Final R indices [I > 2σ(I)] <sup>a,b</sup> | R <sub>1</sub> = 0.0267, wR <sub>2</sub> = 0.027                 |
| R indices (all data) <sup>a,b</sup>        | R <sub>1</sub> = 0.0273, wR <sub>2</sub> = 0.074                 |
| Largest diff. peak and hole                | 0.81 and -0.82 e Å <sup>-3</sup>                                 |

57 <sup>a</sup>R<sub>1</sub> = Σ||F<sub>o</sub>| - |F<sub>c</sub>|| / Σ|F<sub>o</sub>|. <sup>b</sup>wR<sub>2</sub> = [Σ[ w (F<sub>o</sub><sup>2</sup> - F<sub>c</sub><sup>2</sup>)<sup>2</sup>] / Σ[ w (F<sub>o</sub><sup>2</sup>)<sup>2</sup>]]<sup>1/2</sup>.

58 **Table S2** Selected bond lengths (Å) and angles (°) for Zn(INA)<sub>2</sub>(H<sub>2</sub>O)<sub>4</sub>

|            |            |                 |                 |                 |            |
|------------|------------|-----------------|-----------------|-----------------|------------|
| Zn(1)-O(2) | 2.1535(14) | C(1)-C(6)       | 1.520(3)        | C(7)-N(2)-Zn(1) | 123.20(13) |
| Zn(1)-O(3) | 2.0983(14) | C(3)-C(9)       | 1.382(3)        | O(5)-C(1)-C(6)  | 117.55(17) |
| Zn(1)-N(2) | 2.1334(16) | C(6)-C(9)       | 1.390(3)        | O(8)-C(1)-O(5)  | 126.06(18) |
| O(5)-C(1)  | 1.257(3)   | C(6)-C(12)      | 1.388(3)        | O(8)-C(1)-C(6)  | 116.39(17) |
| O(8)-C(1)  | 1.256(2)   | C(7)-C(12)      | 1.389(3)        | N(2)-C(3)-C(9)  | 123.16(18) |
| N(2)-C(3)  | 1.343(3)   | C(3)-N(2)-Zn(1) | 118.85(13)<br>) | C(9)-C(6)-C(1)  | 120.49(17) |
| N(2)-C(7)  | 1.344(3)   | C(3)-N(2)-C(7)  | 117.71(17)<br>) | N(2)-C(7)-C(12) | 122.55(18) |

### 60 3. TG curve of $\text{Zn}(\text{INA})_2(\text{H}_2\text{O})_4$

61 The TG curve of  $\text{Zn}(\text{INA})_2(\text{H}_2\text{O})_4$  is shown in Fig. S2.  $\text{Zn}(\text{INA})_2(\text{H}_2\text{O})_4$  has a  
62 preliminary thermal stability from 30 to 80 °C. Furthermore, 18% weight loss  
63 occurred from 80 to 100 °C, which results from the dehydration process of  
64  $\text{Zn}(\text{INA})_2(\text{H}_2\text{O})_4$  to  $\text{Zn}(\text{INA})_2$ . Finally,  $\text{Zn}(\text{INA})_2$  would be stable to 400 °C .

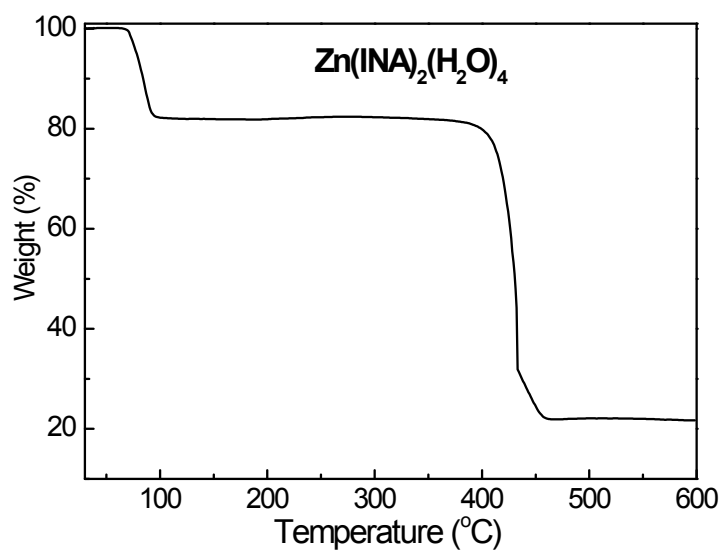

65

66

**Fig. S2** TG curve of  $\text{Zn}(\text{INA})_2(\text{H}_2\text{O})_4$

68 **4. SEM images of  $\text{Zn}(\text{INA})_2$  and  $\text{Zn}(\text{INA})_2(\text{H}_2\text{O})_2(\text{NH}_3)_2$ .**

69 The SEM images of  $\text{Zn}(\text{INA})_2$  and  $\text{Zn}(\text{INA})_2(\text{H}_2\text{O})_2(\text{NH}_3)_2$  are shown in Fig. S3.  
70  $\text{Zn}(\text{INA})_2$  was prepared by removing  $\text{H}_2\text{O}$  from  $\text{Zn}(\text{INA})_2(\text{H}_2\text{O})_4$  whose morphology  
71 and crystal shape became ruptured. However, the morphology of  
72  $\text{Zn}(\text{INA})_2(\text{H}_2\text{O})_2(\text{NH}_3)_2$  became smooth when  $\text{Zn}(\text{INA})_2$  was transformed to  
73  $\text{Zn}(\text{INA})_2(\text{H}_2\text{O})_2(\text{NH}_3)_2$  after adsorbing  $\text{H}_2\text{O}$  and  $\text{NH}_3$ .

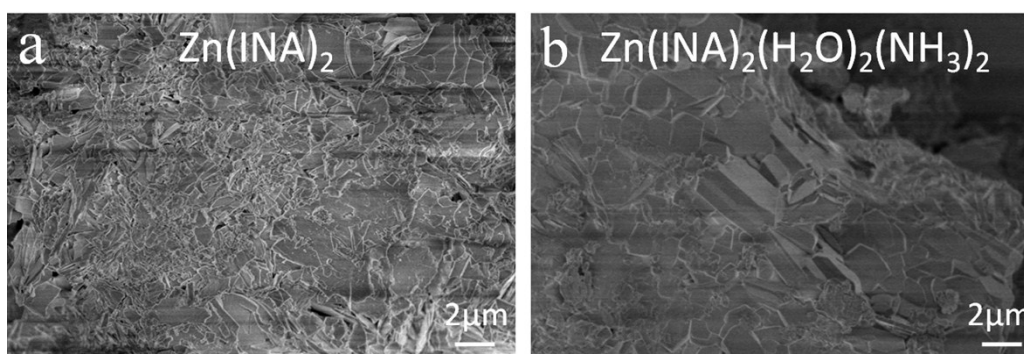

74

75

**Fig. S3** SEM images of  $\text{Zn}(\text{INA})_2$  and  $\text{Zn}(\text{INA})_2(\text{H}_2\text{O})_2(\text{NH}_3)_2$ .

## 77 5. NH<sub>3</sub>-TPD test of Zn(INA)<sub>2</sub>

78 NH<sub>3</sub>-TPD experiment was carried out to explain the desorption temperature of  
79 Zn(INA)<sub>2</sub> after adsorbing dry ammonia. The process of Zn(INA)<sub>2</sub> adsorbing dry  
80 ammonia gas won't result in the structure change, chemisorption of NH<sub>3</sub> at adsorption  
81 sites should be removal at a certain temperature. The first peak in Fig. S4 is related to  
82 the desorption of NH<sub>3</sub> in the range of 80–110 °C. Therefore, the recycle property of  
83 Zn(INA)<sub>2</sub> can be regenerated at 120 °C. The second peak is related to the  
84 decomposition of Zn(INA)<sub>2</sub> in the range of 370–460 °C, which indicates the  
85 activation temperature should be set below 350 °C.

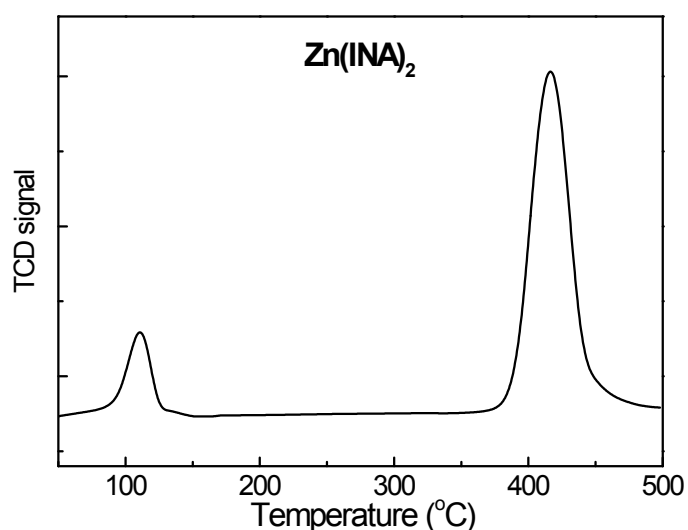

86  
87

**Fig. S4** NH<sub>3</sub>-TPD curve of Zn(INA)<sub>2</sub>

89 **6. H<sub>2</sub>O/NH<sub>3</sub> co-adsorption method of Zn(INA)<sub>2</sub>**

90 The H<sub>2</sub>O/NH<sub>3</sub> co-adsorption method of Zn(INA)<sub>2</sub> is shown in Fig. S5. 0.3 g Zn(INA)<sub>2</sub>  
91 was added into a vial, then transferred to a bigger bottle containing 3 mL ammonia  
92 solution (25%). In the closed environment, Zn(INA)<sub>2</sub> can transform to  
93 Zn(INA)<sub>2</sub>(H<sub>2</sub>O)<sub>2</sub>(NH<sub>3</sub>)<sub>2</sub> through co-adsorption of H<sub>2</sub>O and NH<sub>3</sub> at room temperature.  
94 The transformation process was accompanied by a darker color change.

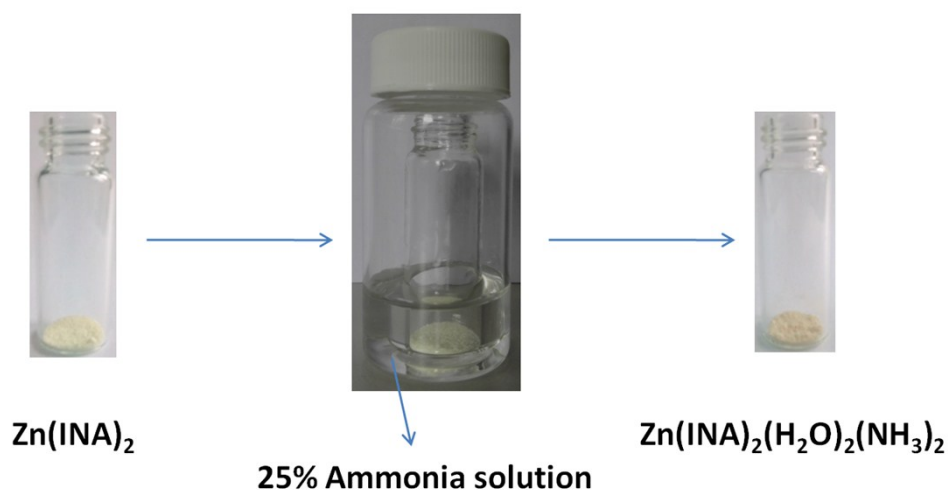

96 **Fig. S5** The H<sub>2</sub>O/NH<sub>3</sub> co-adsorption method of Zn(INA)<sub>2</sub>



## 98 7. Compared PXRD patterns of $\text{Zn}(\text{INA})_2(\text{H}_2\text{O})_2(\text{NH}_3)_2$

99 The PXRD patterns of  $\text{Zn}(\text{INA})_2(\text{H}_2\text{O})_2(\text{NH}_3)_2$ ,  $\text{Cu}(\text{INA})_2(\text{H}_2\text{O})_2(\text{NH}_3)_2$  and  
100  $\text{Zn}(\text{INA})_2(\text{H}_2\text{O})_4$  are shown in Fig. S6. It can be observed that the main peak of PXRD  
101 patterns (about  $15^\circ$ ) of  $\text{Zn}(\text{INA})_2(\text{H}_2\text{O})_2(\text{NH}_3)_2$  moves to the left nearly  $1^\circ$  comparing  
102 to  $\text{Zn}(\text{INA})_2(\text{H}_2\text{O})_4$ , which results from its structure contains two  $\text{NH}_3$  molecules  
103 instead of two  $\text{H}_2\text{O}$  molecules. That pattern is similar to reported  
104  $\text{Cu}(\text{INA})_2(\text{H}_2\text{O})_2(\text{NH}_3)_2$ . Besides, Pawley refinement for the experimental PXRD data  
105 of  $\text{Zn}(\text{INA})_2(\text{H}_2\text{O})_2(\text{NH}_3)_2$  with unit cell parameters of single crystal of  
106  $\text{Zn}(\text{INA})_2(\text{H}_2\text{O})_4$  and  $\text{Cu}(\text{INA})_2(\text{H}_2\text{O})_2(\text{NH}_3)_2$  indicated that Rwp value of  
107  $\text{Zn}(\text{INA})_2(\text{H}_2\text{O})_2(\text{NH}_3)_2$  and  $\text{Cu}(\text{INA})_2(\text{H}_2\text{O})_2(\text{NH}_3)_2$  is smaller than that of  
108  $\text{Zn}(\text{INA})_2(\text{H}_2\text{O})_4$  (Fig. S7). DFT calculation (DMol3 module implemented in  
109 Materials Studio software) also was used to speculate the structure of  
110  $\text{Zn}(\text{INA})_2(\text{H}_2\text{O})_2(\text{NH}_3)_2$ . The results indicated that  $\text{H}_2\text{O}$  and  $\text{NH}_3$  combined with Zn  
111 and formed a similar structure of  $\text{Cu}(\text{INA})_2(\text{H}_2\text{O})_2(\text{NH}_3)_2$  while M-O and M-N bond  
112 lengths have changed from 2.017, 2.444 to 2.292, 2.399 (Fig. S8). Therefore, it  
113 implies that we obtain a new material by the  $\text{H}_2\text{O}/\text{NH}_3$  co-adsorption of  $\text{Zn}(\text{INA})_2$ ,  
114 which is isomorphous to  $\text{Cu}(\text{INA})_2(\text{H}_2\text{O})_2(\text{NH}_3)_2$ .

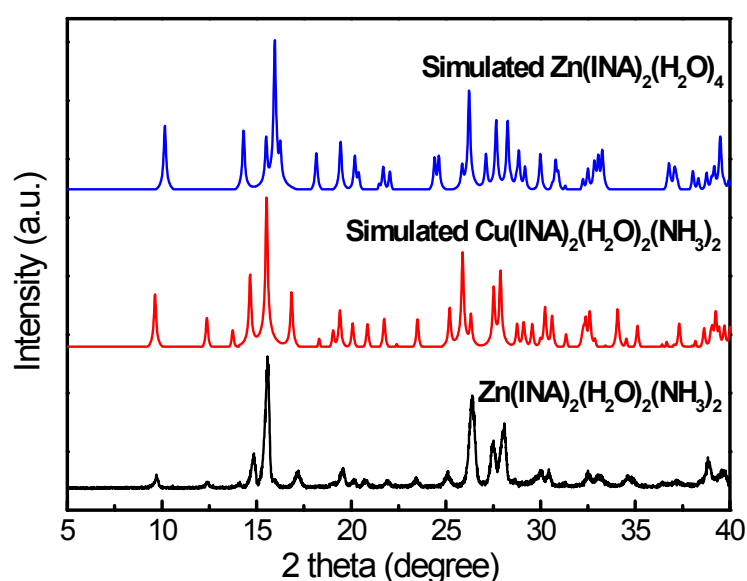

115  
116

Fig. S6 The compared PXRD patterns of materials

117

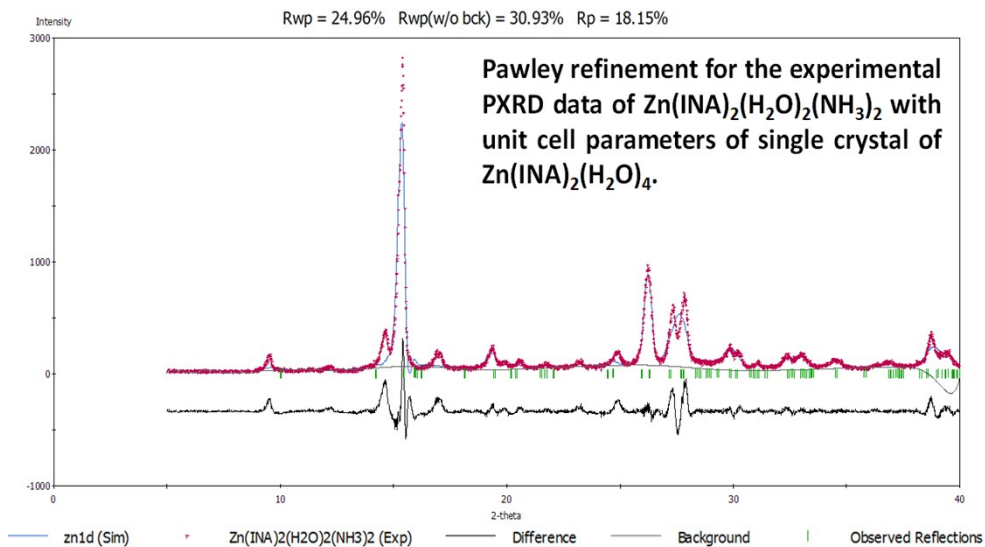

118

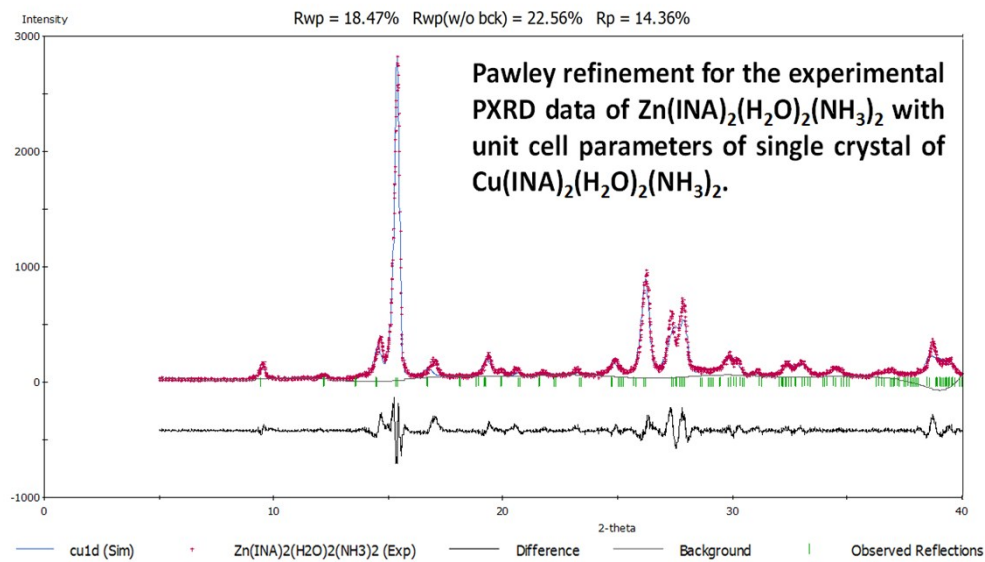

119

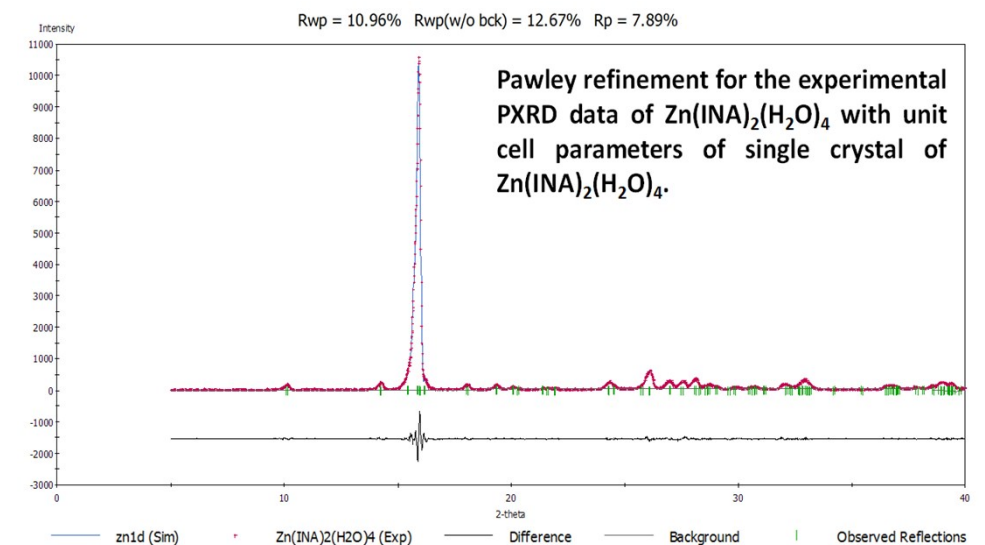

120 Fig. S7 Pawley refinement for the experimental PXRD data with unit cell parameters of single  
121 crystal.

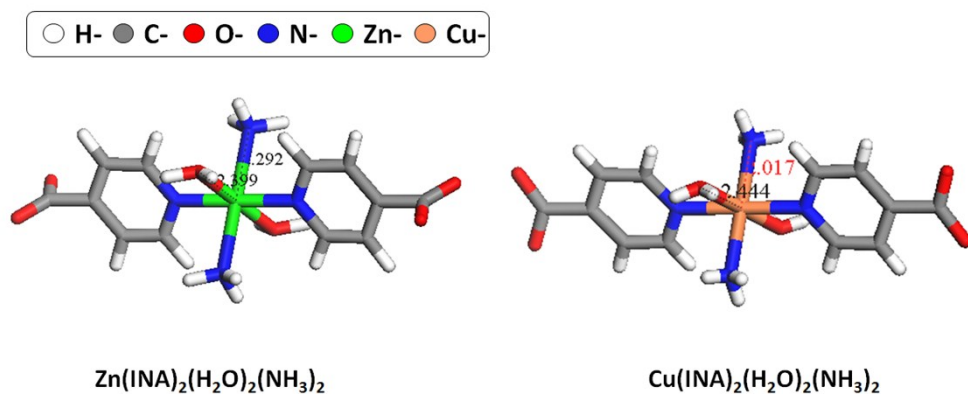

122

123 **Fig. S8** Structure of  $\text{Zn(INA)}_2(\text{H}_2\text{O})_2(\text{NH}_3)_2$  speculated by DFT calculation and the comparison  
 124 with  $\text{Cu(INA)}_2(\text{H}_2\text{O})_2(\text{NH}_3)_2$

126 **8. NH<sub>3</sub> adsorption performance for Zn(INA)<sub>2</sub> in moist condition**

127 Co-adsorption of H<sub>2</sub>O and NH<sub>3</sub> on Zn(INA)<sub>2</sub> were tested in steam atmosphere of 4%,  
128 8%, 12% 16% and 20% ammonia solution at 20 °C, adsorption times of 10 min, 30  
129 min, 60 min and 120 min were investigated in each concentration case. The different  
130 H<sub>2</sub>O/NH<sub>3</sub> ratios in those steam atmospheres are shown in Table S3. The co-adsorption  
131 method in H<sub>2</sub>O/NH<sub>3</sub> steam atmosphere is shown in Fig. S9.

132 **Table S3** H<sub>2</sub>O and NH<sub>3</sub> steam content of different ammonia concentration at 20 °C.<sup>1-3</sup>

| Ammonia concentration<br>(mass) |                  | 4%   | 8%   | 12%  | 16%  | 20%  |
|---------------------------------|------------------|------|------|------|------|------|
| Partial pressure                | H <sub>2</sub> O | 2.07 | 2.12 | 1.84 | 1.78 | 1.62 |
| (kPa)                           | NH <sub>3</sub>  | 3.14 | 7.97 | 13.2 | 20.7 | 30.4 |

133

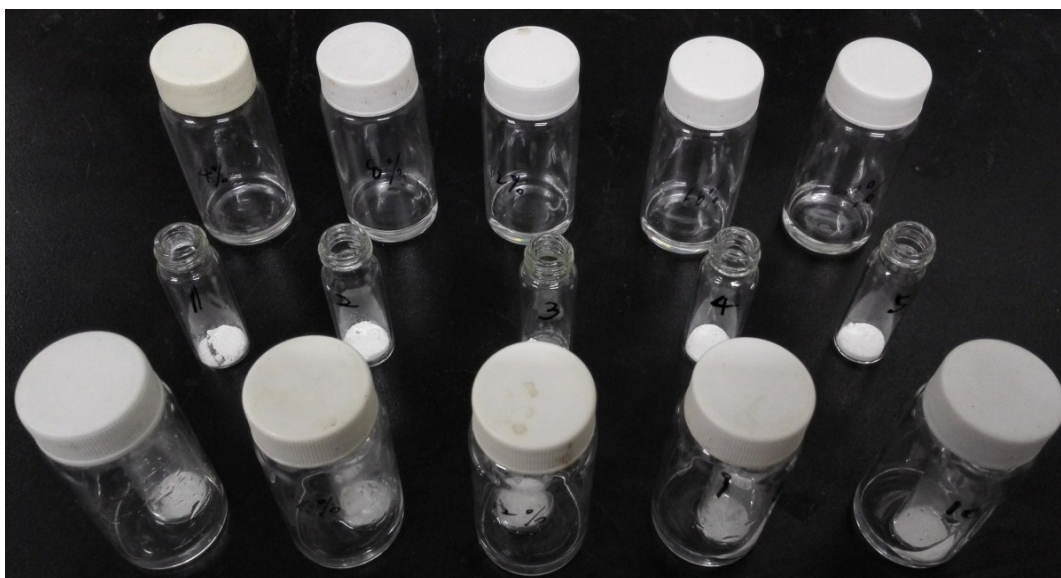

134

135 **Fig. S9** Co-adsorption method in H<sub>2</sub>O and NH<sub>3</sub> steam atmosphere.

136 Ammonia adsorption capacity in moist condition was carried out by the following  
137 method (Fig. S10), namely, the removal NH<sub>3</sub> from Zn(INA)<sub>2</sub>(H<sub>2</sub>O)<sub>2</sub>(NH<sub>3</sub>)<sub>2</sub> was  
138 adsorbed and further dropped by H<sub>2</sub>SO<sub>4</sub> solution, then the corresponding amount of  
139 ammonia adsorption can be calculated.

141 **Test process**

- 142 1. Samples were activated at 150 °C for 6 h, weighed the mass of **m** g.  
143 2. Activated samples were placed in different concentrations of H<sub>2</sub>O/NH<sub>3</sub> vapor  
144 environment for 10, 30, 60 min, then transformed samples to 70 °C oven to removal  
145 the physisorbed H<sub>2</sub>O and NH<sub>3</sub>.  
146 3. The samples were placed to the U-tube and supported by quartz wool, heating the  
147 samples to 200 °C, and maintained for 1 h, the removal gases was blown out by  
148 helium at a purge flow of 20 mL/min.  
149 4. The removal gases was adsorbed by H<sub>2</sub>SO<sub>4</sub> solution (10 mL H<sub>2</sub>O + **x** mL H<sub>2</sub>SO<sub>4</sub>  
150 solution of **c** mol/L).  
151 5. Using methyl orange as indicator, dropping the H<sub>2</sub>SO<sub>4</sub> solution to titration endpoint,  
152 the consumption of H<sub>2</sub>SO<sub>4</sub> solution recorded as **y** mL.  
153 6. Calculating the ammonia adsorption of samples was about  $n=(x+y) \times 2c/m$  mmol/g.  
154 7. The final ammonia adsorption of samples was calculated by averaging three times.  
155 (Samples were regenerated at 150 °C for 2 h)

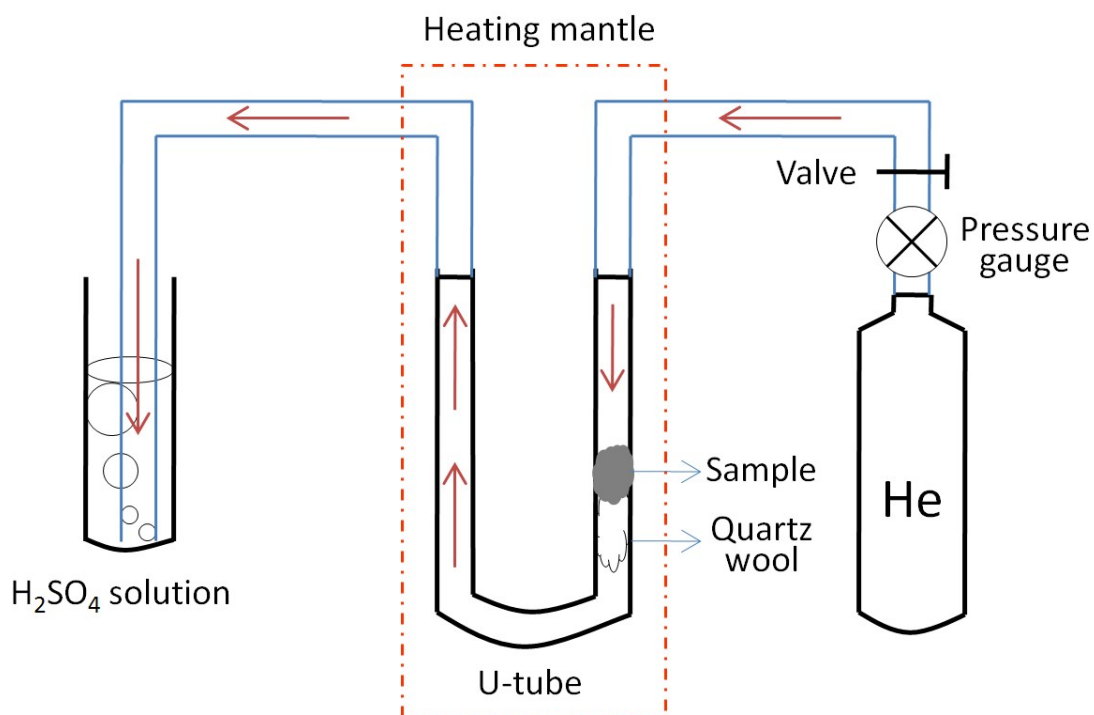

156

157

**Fig. S10** Schematic diagram of ammonia adsorption capacity test

159 **Table S4** Three cycles of NH<sub>3</sub> adsorption amount on Zn(INA)<sub>2</sub> in moist condition at 20 °C.

| Time (min) | NH <sub>3</sub> solution concentration (%) | NH <sub>3</sub> adsorption amount (mmol/g) | Average value (mmol/g) | Time (min) | NH <sub>3</sub> solution concentration (%) | NH <sub>3</sub> adsorption amount (mmol/g) | Average value (mmol/g) |
|------------|--------------------------------------------|--------------------------------------------|------------------------|------------|--------------------------------------------|--------------------------------------------|------------------------|
| 10         | 4%                                         | 0.5                                        | 0.48                   | 30         | 4%                                         | 0.88                                       | 0.88                   |
|            |                                            | 0.45                                       |                        |            |                                            | 0.84                                       |                        |
|            |                                            | 0.48                                       |                        |            |                                            | 0.91                                       |                        |
|            | 8%                                         | 0.74                                       | 0.77                   |            | 8%                                         | 1.45                                       | 1.42                   |
|            |                                            | 0.8                                        |                        |            |                                            | 1.39                                       |                        |
|            |                                            | 0.77                                       |                        |            |                                            | 1.41                                       |                        |
|            | 12%                                        | 0.96                                       | 0.97                   |            | 12%                                        | 1.97                                       | 2.03                   |
|            |                                            | 0.94                                       |                        |            |                                            | 2.07                                       |                        |
|            |                                            | 1.01                                       |                        |            |                                            | 2.06                                       |                        |
|            | 16%                                        | 1.14                                       | 1.19                   |            | 16%                                        | 2.52                                       | 2.59                   |
|            |                                            | 1.2                                        |                        |            |                                            | 2.61                                       |                        |
|            |                                            | 1.23                                       |                        |            |                                            | 2.64                                       |                        |
| 20%        | 1.53                                       | 1.51                                       | 20%                    | 3.27       | 3.24                                       |                                            |                        |
|            | 1.49                                       |                                            |                        | 3.18       |                                            |                                            |                        |
|            | 1.51                                       |                                            |                        | 3.26       |                                            |                                            |                        |
| Time (min) | NH <sub>3</sub> solution concentration (%) | NH <sub>3</sub> adsorption amount (mmol/g) | Average value (mmol/g) | Time (min) | NH <sub>3</sub> solution concentration (%) | NH <sub>3</sub> adsorption amount (mmol/g) | Average value (mmol/g) |
| 60         | 4%                                         | 3.62                                       | 3.59                   | 120        | 4%                                         | 5.01                                       | 4.95                   |
|            |                                            | 3.57                                       |                        |            |                                            | 4.97                                       |                        |
|            |                                            | 3.59                                       |                        |            |                                            | 4.86                                       |                        |
|            | 8%                                         | 4.05                                       | 4.1                    |            | 8%                                         | 5.26                                       | 5.18                   |
|            |                                            | 4.14                                       |                        |            |                                            | 5.13                                       |                        |
|            |                                            | 4.12                                       |                        |            |                                            | 5.15                                       |                        |
|            | 12%                                        | 4.25                                       | 4.28                   |            | 12%                                        | 5.36                                       | 5.37                   |
|            |                                            | 4.3                                        |                        |            |                                            | 5.32                                       |                        |
|            |                                            | 4.28                                       |                        |            |                                            | 5.43                                       |                        |
|            | 16%                                        | 4.56                                       | 4.53                   |            | 16%                                        | 5.64                                       | 5.72                   |
|            |                                            | 4.59                                       |                        |            |                                            | 5.77                                       |                        |
|            |                                            | 4.44                                       |                        |            |                                            | 5.75                                       |                        |
| 20%        | 4.88                                       | 4.82                                       | 20%                    | 5.83       | 5.82                                       |                                            |                        |
|            | 4.74                                       |                                            |                        | 5.75       |                                            |                                            |                        |
|            | 4.83                                       |                                            |                        | 5.88       |                                            |                                            |                        |

161 The used sample at each cycle in Table S4 was regenerated at 150 °C. The  
162 characteristic peaks of obtained material after removing H<sub>2</sub>O and NH<sub>3</sub> from  
163 Zn(INA)<sub>2</sub>(H<sub>2</sub>O)<sub>2</sub>(NH<sub>3</sub>)<sub>2</sub> were consistent with that of simulated Zn(INA)<sub>2</sub> (Fig. S11). It  
164 further confirmed that Zn(INA)<sub>2</sub> material co-adsorbed H<sub>2</sub>O and NH<sub>3</sub> can be  
165 regenerated at 150 °C, which suggests Zn(INA)<sub>2</sub> has reusable property for ammonia  
166 capture in moist condition.

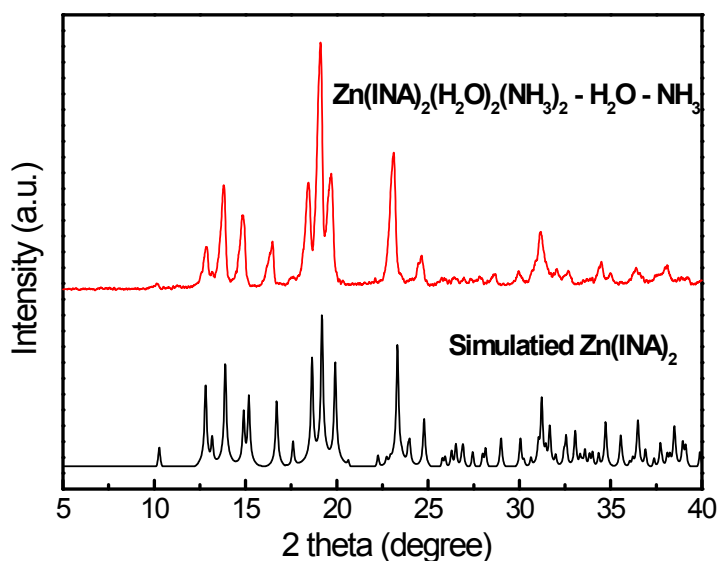

167  
168 **Fig. S11** The PXRD pattern of Zn(INA)<sub>2</sub>(H<sub>2</sub>O)<sub>2</sub>(NH<sub>3</sub>)<sub>2</sub> removed H<sub>2</sub>O and NH<sub>3</sub> at 150 °C. (“-”  
169 means desorb)

170 **References:**

- 171 1. E. P. Perman, *Journal of the Chemical Society, Transactions*, 1901, **79**, 718-725.  
172 2. E. P. Perman, *Journal of the Chemical Society, Transactions*, 1903, **83**, 1168-1184.  
173 3. G. Liu, L. Ma and J. Liu, Handbook of chemistry and chemical property data (inorganic  
174 volume), *Chemical Industry Press: Beijing*, 2002.
